# Supplementary material for: Mast cell desensitization inhibits calcium flux and aberrantly remodels actin
Source: JCI journal article supplement (doi:10.1172/jci87492), 2016-09-25
Supplement: sd1 [file 1]

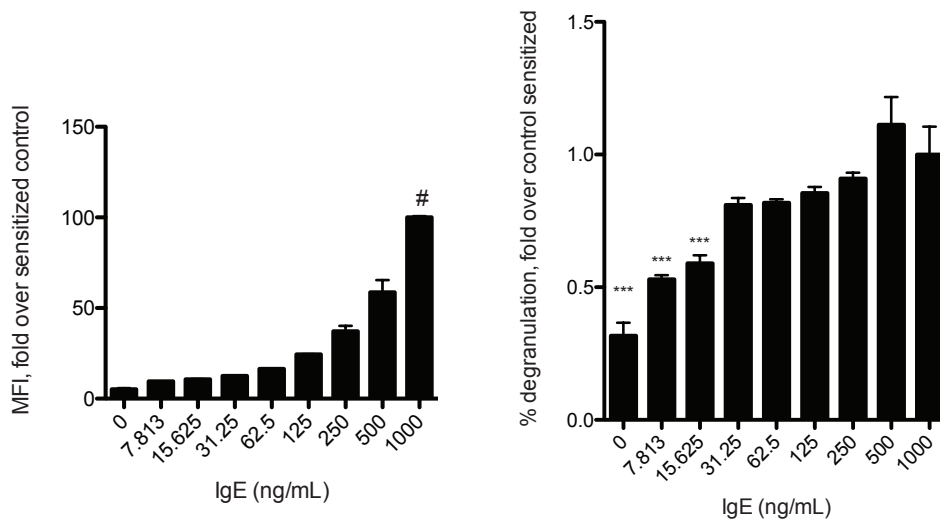

**Supplementary Figure 1. Degranulation does not scale proportionately with Ag binding.**  $5 \times 10^5$  BMDCs per well in quadruplicate were sensitized with various concentrations of anti-TNP IgE, then assayed for A647-labelled TNP-OVA binding via FACS (left) or challenged with 10ng/mL TNP-OVA to assay degranulation (right). Data were expressed as fold over positive control (1000ng/mL IgE). Data are representative of 2 independent experiments. Error bars indicate SE of mean. \*\*\*:  $p < 0.001$  compared to 1000ng/mL group. #:  $p < 0.001$  compared to all other groups as determined by one-way ANOVA.

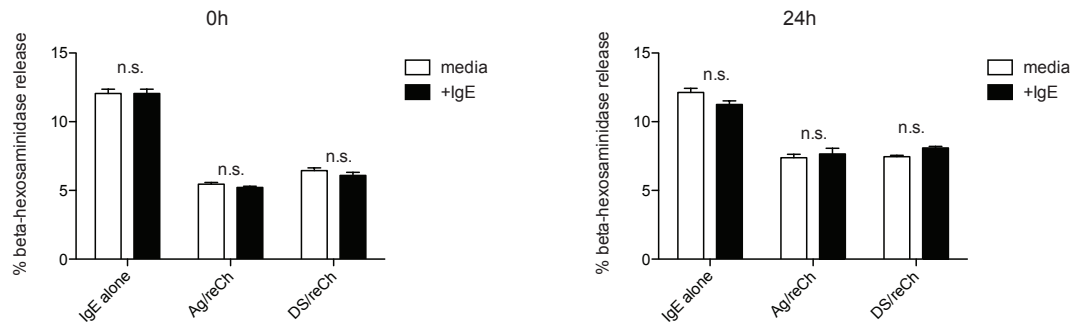

**Supplementary Figure 2. Re-sensitization with IgE does not restore the ability of desensitized BMMCs to degranulate.** Untreated (IgE/Ag), Ag-treated (Ag/reCh) or desensitized (DS/reCh) BMMCs were incubated for 0 or 24h, washed, then incubated for 2h with or without IgE (0.5 $\mu$ g/mL) before challenge with Ag. Degranulation was measured using  $\beta$ -hexosaminidase assay. Data represent SE of mean. n.s.: not significant between media and +IgE groups, as determined via ANOVA.

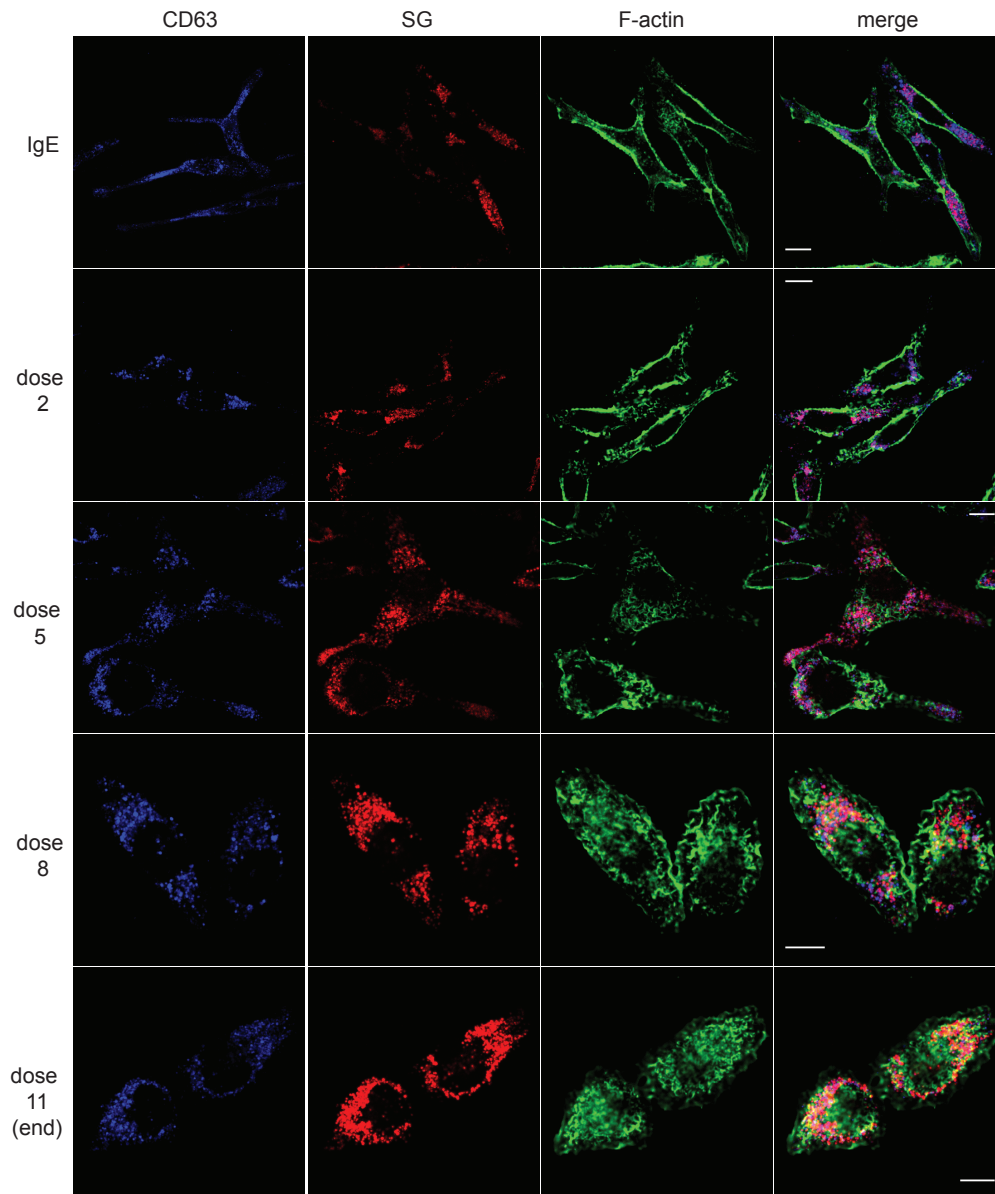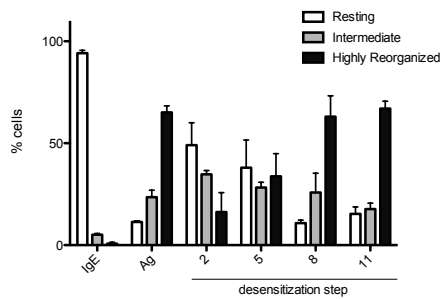

**Supplementary Figure 3. Actin reorganization during desensitization.** RBL-2H3 cells expressing mCherry-serglycin (SG) (red) were seeded onto coverslips. At various stages of desensitization (out of 11), cells were fixed and stained for CD63 (blue) and F-actin (green). Images were taken at 100x magnification and are representative of 3 independent experiments. Scale bar (grey) indicates 10 $\mu$ m. The various F-actin phenotypes of cells in 5 random fields were counted at 60x and expressed as % of total cells and averaged between 3 experiments. Error bars indicate SE of mean.

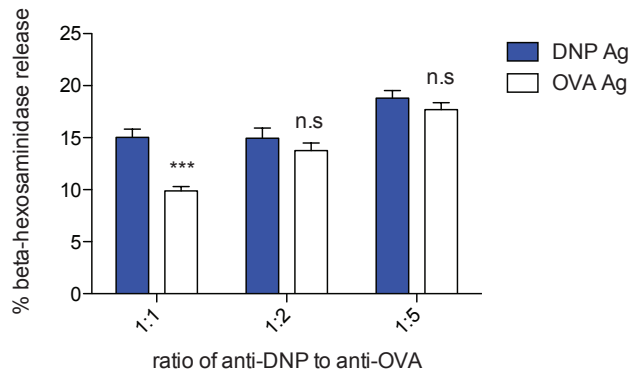

**Supplemental Figure 4. Determining optimal ratios of IgE for MC activation.** RBL-2H3 cells were sensitized with mixtures of anti-DNP IgE and anti-OVA IgE of varying ratios, then challenged with 10ng/mL DNP-HSA (DNP Ag) or 1 $\mu$ g/mL OVA (OVA Ag). Degranulation was measured via beta-hexosaminidase assay. Data indicate SE of mean. \*\*\*:  $p < 0.005$ , n.s: not significant.

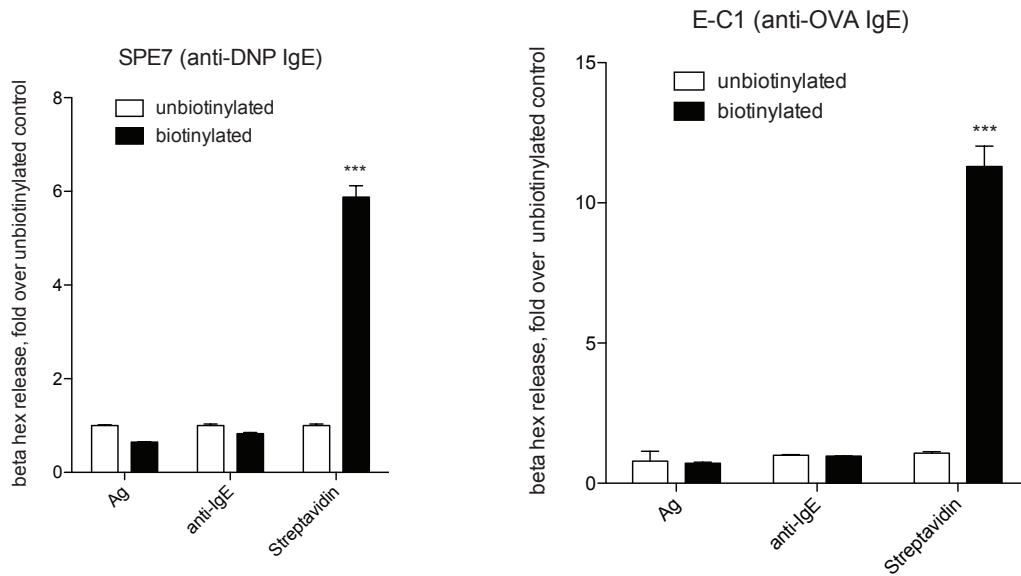

**Supplementary Figure 5. Biotinylated IgE is functional.** Biotinylated or unlabeled anti-DNP IgE (SPE7 clone) or anti-OVA IgE (E-C1 clone) were incubated with BMMCs overnight. After washing with Tyrode's buffer, sensitized cells were challenged with respective antigen (Ag) at 10ng/mL for anti-DNP IgE or 5µg/mL for anti-OVA IgE, 1µg/mL anti-IgE or 0.5 µg/mL streptavidin. Data represent SE of mean. \*\*\*:p<0.005 as determined by ANOVA, with comparisons between unbiotinylated and biotinylated groups.

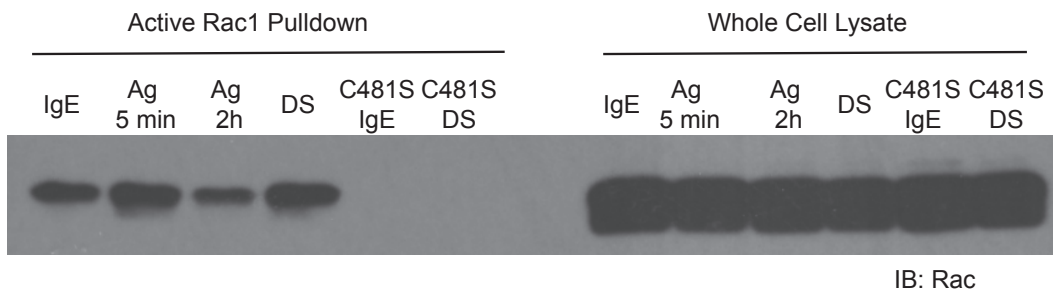

**Supplementary Figure 6. Rac activation during desensitization.** Lysates were prepared from untreated, Ag-challenged or desensitized BMMCs treated or untreated with SpTP<sup>C481S</sup>-TAT, then immunoprecipitated for active Rac1 using GST Pak1-PBD bound to glutathione agarose beads. Immunoprecipitates and control whole cell lysates were then immunoblotted with anti-Rac antibody.

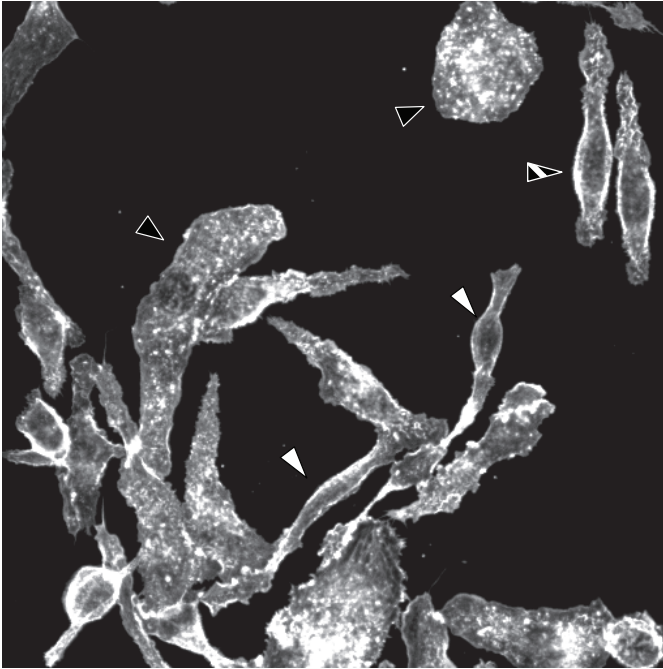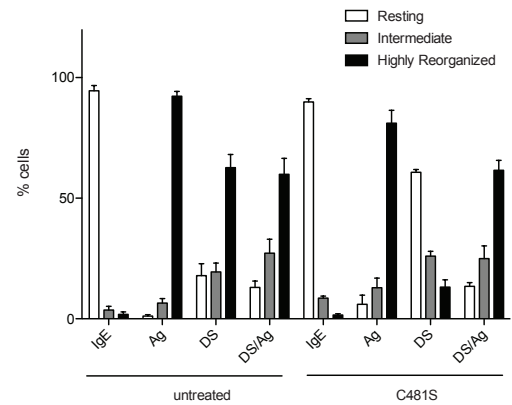

**Supplemental Figure 7. Percentage of actin reorganized cells with desensitization and SptP<sup>C481S</sup>-TAT treatment.** RBL-2H3 cells were seeded onto coverslips and left untreated (IgE), challenged with Ag (Ag) desensitized (DS) or desensitized and subsequently Ag-challenged (DS/Ag). For SptP<sup>C481S</sup>-TAT -treated cells (C481S), cells were incubated with 10µg SptP<sup>C481S</sup>-TAT before Ag challenge. Cells were fixed and stained with A647-phalloidin and imaged at 60x. The number of cells showing resting-type, intermediate or highly reorganized actin phenotypes were counted in 5 random fields per sample. Counts were averaged between 3 independent experiments. An example image showing the various phenotypes is shown. White arrows: resting, hatched arrows: intermediate, empty arrows: highly reorganized. Data represent SE of mean.
